# Supplementary material for: Sirt1 promotes tissue regeneration in zebrafish through regulating the mitochondrial unfolded protein response
Source: PubMed Central journal article supplement — iScience. 2021 Sep 11;24(10):103118. doi: 10.1016/j.isci.2021.103118 (PMC8479786; doi:10.1016/j.isci.2021.103118), 2021-09-11
Supplement: mmc1.pdf [file mmc1.pdf]

**iScience, Volume 24**

**Supplemental information**

**Sirt1 promotes tissue regeneration in zebrafish  
through regulating the mitochondrial  
unfolded protein response**

**Yi-Fan Lin, Jessica Sam, and Todd Evans**

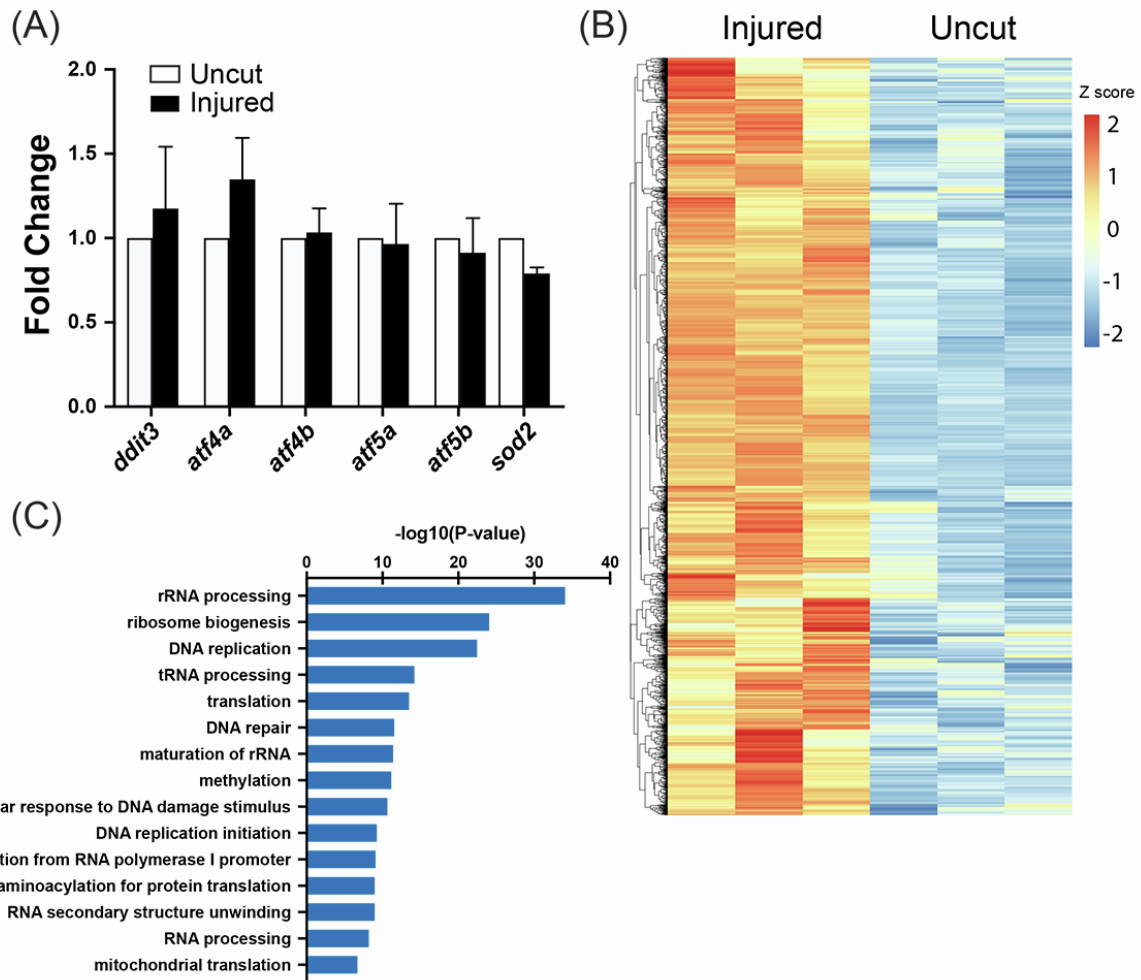

**Supplemental Figure 1. Transcriptional analysis of larval fin tissue during regeneration, Related to Figure 2.** (A) qRT-PCR assays show that none of the known UPR<sup>mt</sup> transcriptional regulators, nor *sod2* is up-regulated in regenerating larval fin tissue. (B) A heatmap shows significantly up-regulated genes (2908 genes) in regenerating larval fin tissue. (C) Top enriched processes identified from the up-regulated genes in regenerating larval fin tissue.

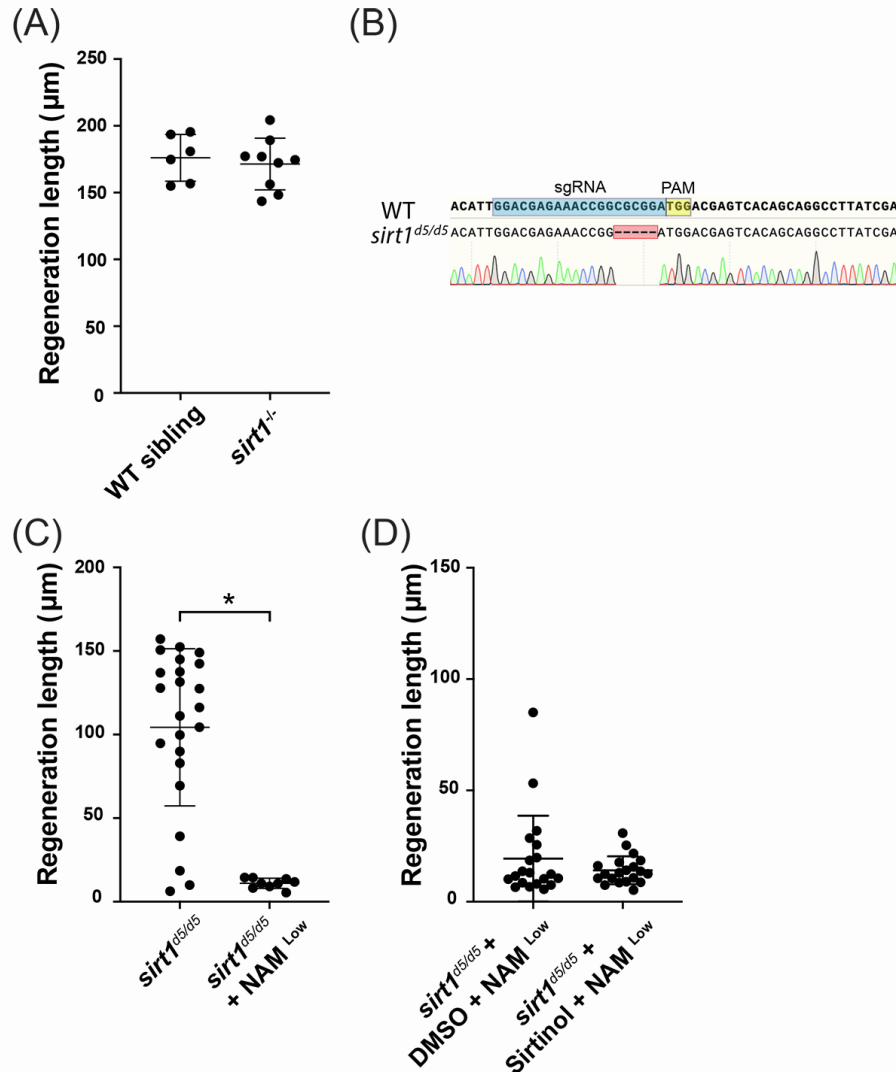

**Supplemental Figure 2. An independent *sirt1* mutant allele also shows a consistent fin regeneration defect, Related to Figure 3.** (A) The *sirt1* mutant larval fish exhibit normal regeneration growth compared to wild type siblings. (B) An independent second *sirt1* mutant allele (indicated here as d5) carries a 5 bp deletion in exon1 of the *sirt1* gene. The official name for this mutant allele is *sirt1*<sup>wcm19/wcm19</sup>. (C) The *sirt1*<sup>d5/d5</sup> mutant larval fish exhibit a strong regeneration defect when incubated in the low concentration of NAM. (D) The *sirt1*<sup>d5/d5</sup> mutant larval fish exhibit a similar regeneration defect when treated with Sirtinol and NAM compared to NAM alone.

**Table 1. List of Primers, Related to STAR Methods**

| <b>cloning</b>                             |                                                       |
|--------------------------------------------|-------------------------------------------------------|
| <i>hspd1</i> promoter                      | f: TGTTTGTGGATCCTGGACCC<br>r: TCAGAGAGTGAGAGAGAGAG    |
| <i>ornithine decarboxylase</i> d2 fragment | f: AGCCATGGCTTCCCGCCGGAG<br>r: CTACACATTGATCCTAGCAGA  |
| <i>hspd1 in situ</i>                       | f: TGTTGAGGACCAGAGTGCTG<br>r: TGAGACAGATGAGGCCTGTG    |
| <i>lonp1 in situ</i>                       | f: CCCATGTGCTCAGGTAAT<br>r: GATCATCAGAGCCGGGATTA      |
| <b>qRT-PCR</b>                             |                                                       |
| <i>hspd1</i>                               | f: ACTCCAGAGGAAATCGCTCA<br>r: CATGCCCTCAATGATCTCAA    |
| <i>hspa9</i>                               | f: GTGGCTGTGATGGATGGAAA<br>r: ATCCTACAAGCCGCTCTCC     |
| <i>clpp</i>                                | f: CAGAGAGCAACAATAAGCCGA<br>r: CAGGTGGAGATGGGATTTAGGA |
| <i>lonp1</i>                               | f: GCTGTTGAGGAGGAAAGTGC<br>r: CGCAGTTTATCTCCGAGGTC    |
| <i>ddit3</i>                               | f: TGGGACAAAATATCGCCAAC<br>r: AATACGACACGCTCCCCTC     |
| <i>atf4a</i>                               | f: GACAGAGCAGAGCACAGCAG<br>r: TCACACGACCCAATCAGAGA    |
| <i>atf4b</i>                               | f: CGCAAACAACCTCAGTGCATC<br>r: TAATTTTCGTGCTGTCGGGTA  |
| <i>atf5a</i>                               | f: TGGTGAACGCAAACAGAAGA<br>r: GCTGTTCCCTCCAATGAGTCC   |
| <i>atf5b</i>                               | f: TCAGCACGATGGAGTTTCAG<br>r: ATCTATGCCGCCACAATTC     |
| <i>sod2</i>                                | f: TTCATCACAGCAAGCACCAT<br>r: ATTTCAATGCAGGCTGAAGG    |

|                                       |                                 |
|---------------------------------------|---------------------------------|
| <i>polrmt</i>                         | f: TGTTGTCGCATGTGTCTCAG         |
|                                       | r: GCCTTCGGTAAATCGTAGCC         |
| <i>tf2bm</i>                          | f: GTGTTGACTCGTGCTTTGCT         |
|                                       | r: CCCTCCAGTCTGCTCTCCA          |
| <b><i>sirt1</i></b>                   |                                 |
| <b>mutagenesis</b>                    |                                 |
| <i>gRNA to target</i>                 |                                 |
| <i>sirt1</i> (PAM site<br>underlined) | GGACGAGAAACCGGC <u>GCGGATGG</u> |
|                                       |                                 |
| <i>sirt1 genotyping</i>               | f: TGACGTCACGCCACGGCATTACCG     |
|                                       | r: CGGAGATCTCGGGCTCCGGGTCGGCTG  |
